# Supplementary material for: The Low-Diversity Fecal Microbiota of the Critically Endangered Kākāpō Is Robust to Anthropogenic Dietary and Geographic Influences
Source: Front Microbiol. 2017 Oct 20;8:2033. doi: 10.3389/fmicb.2017.02033 (PMC5655120; doi:10.3389/fmicb.2017.02033)
Supplement: Supplementary file 1 [file Table1.XLSX]

## Sheet: manuscript_for_EMIR_tableS1.txt
#Supplementary Table S1
#This table contains the metadata for all kakapo fecal samples used in this study
#SuppFoodConsumption represents the mean quantity, in grams, of supplementary food pellets consumed every four days over the two weeks immediately prior to sample collection
#Dashes stand in for missing information (either "unknown" or "not applicable")
Sample ID	Bird Name	Diet	Island	Age	Sample Year	Sample Month	SuppFoodConsumption
A2-1_S99	Aranga2	-	Codfish	chick	2016	3	-
A2-2_S103	Aranga2	-	Codfish	chick	2016	3	-
A2-3_S106	Aranga2	-	Codfish	chick	2016	3	-
A2-4_S119	Aranga2	-	Codfish	chick	2016	3	-
A3-1_S107	Aranga3	-	Codfish	chick	2016	3	-
A3-2_S108	Aranga3	-	Codfish	chick	2016	3	-
Alice1_S68	Alice	HPC	Codfish	adult	2014	7	-
Arab1_S10	Arab	HPC	Codfish	adult	2015	11	240
Arab2_S43	Arab	HPC	Codfish	adult	2016	2	330
Arab3_S50	Arab	HPC	Codfish	adult	2014	7	-
Arab4_S55	Arab	HPC	Codfish	adult	2016	2	330
Blades1_S3	Blades	Unfed	Codfish	adult	2015	11	0
Blades2_S30	Blades	Unfed	Codfish	adult	2016	3	0
Blake1_S163	Blake	-	Anchor	adult	2016	6	-
Bonus1_S28	Bonus	Unfed	Codfish	adult	2016	2	0
Bonus2_S67	Bonus	Unfed	Codfish	adult	2014	7	0
Boss1_S13	Boss	Unfed	Codfish	adult	2015	11	0
Cyndy1_S4	Cyndy	Pumpkin	Codfish	adult	2015	11	115
Cyndy2_S71	Cyndy	HPC	Codfish	adult	2014	7	-
Cyndy3_S72	Cyndy	Pumpkin	Codfish	adult	2015	11	188
Gulliver1_S15	Gulliver	HPC	Codfish	adult	2015	11	102
Gulliver2_S31	Gulliver	HPC	Codfish	adult	2016	2	70
Gulliver3_S40	Gulliver	HPC	Codfish	adult	2016	2	70
Gulliver4_S44	Gulliver	HPC	Codfish	adult	2016	2	70
Gulliver5_S46	Gulliver	HPC	Codfish	adult	2016	2	70
Gumboots1_S17	Gumboots	Pumpkin	Codfish	adult	2015	11	336
Gumboots2_S66	Gumboots	HPC	Codfish	adult	2014	7	-
Henry1_S81	Henry	-	Anchor	chick	2016	6	-
Hoki1_S35	Hoki	HPC	Codfish	adult	2016	3	143
Hoki2_S47	Hoki	HPC	Codfish	adult	2016	2	35
Hoki3_S78	Hoki	HPC	Codfish	adult	2014	7	-
HT1-1_S103	Hine Taumai1	-	Anchor	chick	2016	3	-
HT2-1_S187	Hine Taumai2	-	Anchor	chick	2016	3	-
Huhana1-1_S127	Huhana1	-	Anchor	chick	2016	5	-
Jimmy1_S14	Jimmy	Pumpkin	Codfish	adult	2015	11	157
Jimmy2_S27	Jimmy	Pumpkin	Codfish	adult	2016	2	80
Jimmy3_S37	Jimmy	Pumpkin	Codfish	adult	2016	2	80
Jimmy4_S39	Jimmy	Pumpkin	Codfish	adult	2016	2	80
Jimmy5_S58	Jimmy	Pumpkin	Codfish	adult	2016	3	115
Jimmy6_S73	Jimmy	HPC	Codfish	adult	2014	7	-
Juanma1_S12	Juanma	Pumpkin	Codfish	adult	2015	11	-
Juanma2_S41	Juanma	Pumpkin	Codfish	adult	2016	2	177
Juanma3_S52	Juanma	HPC	Codfish	adult	2014	7	-
Kuia2-1_S175	Kuia2	-	Anchor	chick	2016	3	-
Kuihi1-1_S98	Kuihi1	-	Codfish	chick	2016	3	-
Kuihi1-2_S124	Kuihi1	-	Codfish	chick	2016	3	-
Lee1_S75	Lee	-	Pearl	adult	1999	4	-
Lee2_S91	Lee	-	Pearl	adult	1998	8	-
Luke1_S9	Luke	HPC	Codfish	adult	2015	11	215
Luke2_S33	Luke	HPC	Codfish	adult	2016	2	70
Luke3_S38	Luke	HPC	Codfish	adult	2016	2	70
Luke4_S59	Luke	HPC	Codfish	adult	2016	2	70
Luke5_S74	Luke	HPC	Codfish	adult	2014	7	-
Mahli1_S21	Mahli	Unfed	Codfish	adult	2015	11	0
Mahli2_S62	Mahli	Unfed	Codfish	adult	2014	12	-
Merv1_S65	Merv	HPC	Codfish	adult	2014	7	-
Merv2_S84	Merv	-	Codfish	adult	1999	11	-
Merv3_S89	Merv	-	Codfish	adult	1999	9	-
Merv4_S90	Merv	-	Pearl	adult	1998	8	-
Millie1_S1	Millie	Unfed	Codfish	adult	2015	11	0
MM1_S2	Margaret Maree	Pumpkin	Codfish	adult	2015	11	-
MM2_S64	Margaret Maree	HPC	Codfish	adult	2014	7	-
Nog1_S18	Nog	Pumpkin	Codfish	adult	2015	11	375
Nog2_S70	Nog	HPC	Codfish	adult	2014	7	-
Nog3_S83	Nog	-	Pearl	adult	1998	8	-
Nog4_S88	Nog	-	Codfish	adult	1999	1	-
Nora1-1_S97	Nora1	-	Codfish	chick	2016	3	-
P1-1_S105	Pearl1	-	Codfish	chick	2016	3	-
P1-2_S116	Pearl1	-	Codfish	chick	2016	3	-
P1-3_S122	Pearl1	-	Codfish	chick	2016	3	-
P2-1_S100	Pearl2	-	Codfish	chick	2016	3	-
P2-2_S104	Pearl2	-	Codfish	chick	2016	3	-
P2-3_S117	Pearl2	-	Codfish	chick	2016	3	-
P2-4_S118	Pearl2	-	Codfish	chick	2016	3	-
Pearl1_S7	Pearl	HPC	Codfish	adult	2015	11	205
Pearl2_S48	Pearl	HPC	Codfish	adult	2016	3	57
Piripi1_S87	Piripi	-	Maud	adult	1999	3	-
Piripi2_S94	Piripi	-	Maud	adult	1998	9	-
Po1_S29	Po	Pumpkin	Codfish	adult	2016	2	132
Pounamu1_S19	Pounamu	HPC	Codfish	adult	2015	11	214
Pounamu2_S53	Pounamu	HPC	Codfish	adult	2014	7	-
Ra3-1_S115	Ra3	-	Anchor	chick	2016	3	-
Rakiura1_S16	Rakiura	Pumpkin	Codfish	adult	2015	11	145
Ralph1_S24	Ralph	Unfed	Codfish	adult	2015	11	0
Ralph2_S34	Ralph	Unfed	Codfish	adult	2016	2	0
Ralph3_S56	Ralph	Unfed	Codfish	adult	2014	7	0
Ralph4_S76	Ralph	-	Pearl	adult	1998	8	-
Ralph5_S80	Ralph	-	Pearl	adult	2001	2	-
Ralph6_S86	Ralph	-	Pearl	adult	1999	7	-
Rangi1_S23	Rangi	Unfed	Codfish	adult	2015	11	0
RH1_S81	Richard Henry	-	Maud	adult	1999	3	-
RH2_S93	Richard Henry	-	Maud	adult	1998	9	-
Ruth1_S32	Ruth	Pumpkin	Codfish	adult	2016	2	119
Ruth2_S63	Ruth	HPC	Codfish	adult	2014	7	-
Sinbad1_S22	Sinbad	HPC	Codfish	adult	2015	11	-
Sinbad2_S42	Sinbad	Pumpkin	Codfish	adult	2016	2	114
Sinbad3_S45	Sinbad	Pumpkin	Codfish	adult	2016	2	141
Sinbad4_S54	Sinbad	HPC	Codfish	adult	2014	7	-
Smoko1_S5	Smoko	HPC	Codfish	adult	2015	11	330
Smoko2_S57	Smoko	HPC	Codfish	adult	2014	7	-
Smoko3_S79	Smoko	-	Maud	adult	1999	3	-
Smoko4_S95	Smoko	-	Maud	adult	1998	-	-
Stella2-1_S174	Stella2	-	Anchor	chick	2016	5	-
Stella3-1_S70	Stella3	-	Anchor	chick	2016	4	-
Stumpy1_S51	Stumpy	HPC	Codfish	adult	2014	7	-
Stumpy2_S82	Stumpy	-	Maud	adult	1998	9	-
Stumpy3_S85	Stumpy	-	Maud	adult	1999	3	-
Sue1_S20	Sue1	Pumpkin	Codfish	adult	2015	11	150
Sue2-1_S113	Sue2	-	Codfish	chick	2016	3	-
Suz1-1_S111	Suz1	-	Codfish	chick	2016	3	-
Suzanne1_S6	Suzanne	HPC	Codfish	adult	2015	11	100
T1-1_S110	Tumeke1	-	Codfish	chick	2016	3	-
T1-2_S112	Tumeke1	-	Codfish	chick	2016	3	-
T2-1_S121	Tumeke3	-	Codfish	chick	2016	3	-
Tiaka1_S11	Tiaka	Unfed	Codfish	adult	2015	11	0
Tohu1_S26	Tohu	Unfed	Codfish	adult	2016	3	0
Tumeke1_S60	Tumeke	Pumpkin1	Codfish	adult	2014	7	-
T3-1_S139	Tumeke3	-	Anchor	chick	2016	4	-
Tutoko1_S8	Tutoko	Pumpkin	Codfish	adult	2015	11	185
Tutoko2_S69	Tutoko	HPC	Codfish	adult	2014	7	-
W1-1_S101	Wendy1	-	Codfish	chick	2016	3	-
W1-2_S102	Wendy1	-	Codfish	chick	2016	3	-
W1-3_S109	Wendy1	-	Codfish	chick	2016	3	-
W1-4_S115	Wendy1	-	Codfish	chick	2016	3	-
W1-5_S120	Wendy1	-	Codfish	chick	2016	3	-
W1-6_S123	Wendy1	-	Codfish	chick	2016	3	-
Wai1-1_S151	Wai1	-	Anchor	chick	2016	5	-
Wai3-1_S162	Wai3	-	Anchor	chick	2016	2
Waynebo1_S77	Waynebo	-	Pearl	adult	1998	8	-
Waynebo2_S96	Waynebo	-	-	adult	2000	9	-
Wendy1_S36	Wendy	HPC	Codfish	adult	2016	2	35
Wendy2_S49	Wendy	HPC	Codfish	adult	2014	10	-
Wendy2-1_S186	Wendy2	-	Anchor	chick	2016	3	-
Wiremu1_S25	Wiremu	Pumpkin	Codfish	adult	2016	2	-
Wiremu2_S61	Wiremu	HPC	Codfish	adult	2014	7	-
