# Supplementary material for: The Low-Diversity Fecal Microbiota of the Critically Endangered Kākāpō Is Robust to Anthropogenic Dietary and Geographic Influences
Source: Front Microbiol. 2017 Oct 20;8:2033. doi: 10.3389/fmicb.2017.02033 (PMC5655120; doi:10.3389/fmicb.2017.02033)
Supplement: Supplementary file 5 [file Table5.XLSX]

## Sheet: Supplementary_Table_S5
#Supplementary Table S5
#Collated results from 1000 trials of PERMANOVA following random subsampling down to one sample per individual for adults and chicks on Codfish Island.
Trial	F value	R2	Pr(>F)
1	1.71871	0.0411975	0.0402
2	1.53497	0.0369561	0.0608
3	1.6531	0.0396873	0.0492
4	1.84064	0.0439917	0.0236
5	1.72426	0.0413251	0.0394
6	1.78336	0.0426812	0.0296
7	2.07129	0.049233	0.0098
8	1.49994	0.0361432	0.0772
9	1.6215	0.0389582	0.0512
10	1.40325	0.0338923	0.1054
11	1.35045	0.0326587	0.1112
12	1.50491	0.0362585	0.0774
13	1.52201	0.0366556	0.0628
14	1.91974	0.0457956	0.0144
15	1.89742	0.0452873	0.019
16	1.68429	0.0404058	0.0406
17	1.58364	0.0380832	0.0544
18	1.86088	0.044454	0.0196
19	1.92296	0.0458689	0.0192
20	1.32758	0.0321234	0.1504
21	1.60343	0.0385407	0.0466
22	1.44844	0.0349456	0.0952
23	1.45428	0.0350815	0.0936
24	1.63195	0.0391994	0.0522
25	1.76898	0.0423516	0.0362
26	1.42931	0.0344999	0.102
27	1.79108	0.0428579	0.0312
28	1.70942	0.040984	0.049
29	1.42442	0.034386	0.0954
30	1.90292	0.0454126	0.019
31	1.89373	0.0452033	0.019
32	1.67141	0.0401093	0.0414
33	1.49476	0.0360228	0.0706
34	1.70709	0.0409304	0.0362
35	2.06378	0.0490631	0.0082
36	1.89769	0.0452934	0.0178
37	1.70732	0.0409358	0.0352
38	1.84119	0.0440043	0.0272
39	1.64053	0.0393975	0.0452
40	1.53366	0.0369257	0.066
41	1.6541	0.0397103	0.0446
42	1.81944	0.043507	0.0234
43	1.452	0.0350284	0.0946
44	1.90702	0.0455061	0.0164
45	1.74395	0.0417772	0.0404
46	1.79669	0.0429864	0.0266
47	1.68222	0.0403582	0.046
48	1.4988	0.0361168	0.07
49	1.81961	0.0435108	0.0244
50	1.71643	0.0411452	0.0462
51	1.65011	0.0396183	0.0526
52	1.72739	0.041397	0.0434
53	1.67842	0.0402707	0.0448
54	1.91583	0.0457067	0.0216
55	1.72802	0.0414114	0.0386
56	1.46272	0.0352779	0.0774
57	1.80399	0.0431536	0.03
58	1.6333	0.0392305	0.0468
59	1.62681	0.0390808	0.0552
60	2.08145	0.0494623	0.0152
61	1.96141	0.0467433	0.017
62	1.90307	0.0454161	0.0192
63	1.63623	0.0392983	0.0458
64	1.65646	0.0397647	0.0476
65	1.57891	0.0379737	0.0624
66	1.4742	0.035545	0.0902
67	1.63902	0.0393627	0.0458
68	2.00021	0.0476237	0.0134
69	1.77856	0.0425711	0.0402
70	1.7199	0.0412249	0.0374
71	1.59519	0.0383503	0.055
72	1.60478	0.0385719	0.0646
73	1.73941	0.041673	0.0388
74	1.43454	0.0346219	0.0888
75	1.42015	0.0342865	0.0956
76	1.73957	0.0416768	0.0324
77	1.66115	0.0398728	0.0512
78	1.84486	0.0440881	0.0312
79	1.78741	0.042774	0.035
80	1.66143	0.0398794	0.0424
81	1.78085	0.0426235	0.0268
82	1.48626	0.0358253	0.0846
83	1.75105	0.0419403	0.0358
84	1.6404	0.0393944	0.0572
85	1.70633	0.0409129	0.0468
86	1.90488	0.0454572	0.019
87	1.85504	0.0443206	0.0252
88	1.58202	0.0380458	0.0498
89	1.72847	0.0414217	0.037
90	1.39388	0.0336737	0.1042
91	1.92396	0.0458916	0.0204
92	1.46971	0.0354406	0.0876
93	1.53453	0.0369459	0.0648
94	1.59459	0.0383364	0.0636
95	1.28579	0.0311436	0.1678
96	1.52458	0.0367151	0.06
97	2.04769	0.0486993	0.0102
98	1.6843	0.0404062	0.0406
99	1.75324	0.0419904	0.0312
100	1.99417	0.0474867	0.0138
101	1.74883	0.0418894	0.0298
102	1.95698	0.0466426	0.0146
103	1.72473	0.041336	0.0292
104	1.63082	0.0391733	0.0526
105	1.53023	0.0368462	0.069
106	1.81753	0.0434634	0.0268
107	2.2532	0.0533262	0.008
108	1.86262	0.0444936	0.021
109	1.56054	0.0375486	0.0654
110	1.88489	0.0450017	0.0216
111	1.72216	0.0412768	0.03
112	1.72828	0.0414174	0.0356
113	1.53232	0.0368945	0.072
114	1.69259	0.0405968	0.0382
115	1.87672	0.0448153	0.0164
116	1.59176	0.0382709	0.0616
117	2.04083	0.048544	0.013
118	1.5214	0.0366412	0.0722
119	1.59615	0.0383725	0.0584
120	1.62274	0.0389868	0.0446
121	1.79644	0.0429807	0.027
122	1.32274	0.03201	0.1394
123	1.60319	0.0385352	0.0572
124	1.76135	0.0421765	0.0294
125	1.68767	0.0404838	0.0376
126	1.92287	0.0458669	0.0232
127	2.00948	0.047834	0.013
128	1.7883	0.0427943	0.0322
129	1.99652	0.0475401	0.011
130	1.36511	0.0330016	0.1252
131	1.61259	0.0387524	0.051
132	1.48367	0.0357652	0.0814
133	1.89837	0.045309	0.0162
134	1.6851	0.0404245	0.0374
135	1.89483	0.0452282	0.0266
136	1.42293	0.0343514	0.0916
137	1.95912	0.0466912	0.0174
138	1.64331	0.0394616	0.0498
139	2.09621	0.0497958	0.0136
140	1.73536	0.04158	0.0352
141	1.531	0.036864	0.0682
142	1.49965	0.0361364	0.0756
143	1.89426	0.0452152	0.0154
144	1.81624	0.0434338	0.0226
145	1.59403	0.0383235	0.0574
146	1.64015	0.0393886	0.0504
147	1.44537	0.0348741	0.089
148	1.68851	0.040503	0.0434
149	1.51884	0.036582	0.0752
150	1.4658	0.0353497	0.0828
151	1.58075	0.0380163	0.0516
152	1.72199	0.041273	0.0306
153	1.81818	0.0434782	0.0248
154	1.79373	0.0429186	0.0368
155	1.81907	0.0434985	0.0276
156	1.70715	0.0409317	0.0378
157	1.80045	0.0430724	0.0256
158	1.55676	0.0374612	0.0676
159	1.86552	0.0445598	0.0266
160	1.63927	0.0393684	0.0408
161	1.79394	0.0429234	0.0222
162	1.68753	0.0404805	0.0392
163	1.38267	0.0334119	0.1254
164	1.49889	0.0361188	0.0842
165	1.72446	0.0413297	0.0342
166	1.51398	0.0364691	0.0676
167	1.77157	0.0424109	0.0342
168	1.47186	0.0354905	0.087
169	1.65603	0.0397548	0.0452
170	1.5916	0.0382674	0.061
171	1.45162	0.0350197	0.0948
172	1.69243	0.0405933	0.0334
173	1.65047	0.0396267	0.0472
174	1.55745	0.037477	0.0708
175	1.69328	0.0406129	0.0392
176	1.45982	0.0352105	0.0964
177	1.86782	0.0446123	0.021
178	1.69528	0.0406589	0.0398
179	1.99654	0.0475406	0.0102
180	2.05626	0.0488932	0.0142
181	2.037	0.0484573	0.0116
182	1.83251	0.043806	0.0266
183	1.48736	0.035851	0.086
184	1.95346	0.0465626	0.0184
185	1.56095	0.037558	0.0636
186	1.55123	0.0373329	0.0664
187	1.69307	0.040608	0.0476
188	1.4271	0.0344484	0.0984
189	1.33986	0.0324108	0.1424
190	1.84554	0.0441036	0.0188
191	1.74521	0.0418063	0.0278
192	1.55847	0.0375006	0.0616
193	1.8368	0.0439038	0.0212
194	1.51551	0.0365047	0.0734
195	1.37377	0.0332038	0.113
196	1.82357	0.0436016	0.0232
197	2.05625	0.0488929	0.0126
198	1.90102	0.0453692	0.0208
199	1.71895	0.0412032	0.034
200	1.64419	0.0394819	0.0524
201	2.06984	0.0492	0.0116
202	1.63532	0.0392773	0.0488
203	1.47006	0.0354487	0.0956
204	1.89194	0.0451625	0.0248
205	1.7705	0.0423863	0.024
206	1.72001	0.0412275	0.0386
207	1.80086	0.0430819	0.0262
208	1.50363	0.0362289	0.0852
209	1.58922	0.0382123	0.0672
210	2.05423	0.0488471	0.0112
211	1.33466	0.032289	0.1292
212	1.46866	0.0354161	0.0826
213	1.41189	0.0340939	0.1044
214	1.79072	0.0428498	0.0222
215	1.86173	0.0444734	0.023
216	1.54834	0.037266	0.0682
217	1.6209	0.0389444	0.0576
218	1.92371	0.045886	0.0196
219	1.7314	0.041489	0.0424
220	1.96513	0.0468277	0.0154
221	1.84338	0.0440542	0.0236
222	1.92345	0.04588	0.0212
223	1.57634	0.0379144	0.0624
224	1.53701	0.0370034	0.07
225	1.72272	0.0412896	0.0354
226	1.49307	0.0359836	0.072
227	2.03183	0.0483402	0.0126
228	1.82249	0.0435769	0.0284
229	1.41395	0.0341418	0.1006
230	1.49638	0.0360604	0.0834
231	1.63882	0.039358	0.0476
232	1.90947	0.0455617	0.0236
233	1.66603	0.0399854	0.0396
234	1.95522	0.0466026	0.0162
235	1.86228	0.0444859	0.0268
236	1.82493	0.0436326	0.0266
237	1.60846	0.038657	0.0526
238	1.79454	0.0429372	0.0302
239	1.87631	0.044806	0.0226
240	1.84578	0.044109	0.0222
241	1.80025	0.043068	0.032
242	1.89574	0.0452491	0.0272
243	1.67776	0.0402556	0.0402
244	1.69765	0.0407134	0.0422
245	1.76093	0.042167	0.0312
246	2.01047	0.0478564	0.0122
247	1.75286	0.0419819	0.0312
248	1.99145	0.0474251	0.016
249	1.71979	0.0412224	0.0282
250	1.87054	0.0446743	0.0226
251	1.56181	0.0375781	0.0646
252	2.04042	0.0485348	0.0136
253	1.47348	0.0355281	0.0774
254	1.39385	0.0336728	0.1064
255	1.99447	0.0474936	0.0162
256	1.56686	0.037695	0.0602
257	1.36861	0.0330832	0.1178
258	1.68173	0.040347	0.0396
259	1.62774	0.0391022	0.0452
260	1.7517	0.0419552	0.038
261	1.73502	0.0415722	0.0348
262	1.90426	0.0454432	0.0246
263	1.79492	0.0429458	0.0236
264	1.63726	0.0393219	0.0462
265	2.00997	0.047845	0.0118
266	1.73515	0.0415753	0.0362
267	1.63949	0.0393735	0.049
268	1.75891	0.0421205	0.0358
269	1.96006	0.0467125	0.0208
270	1.7067	0.0409214	0.035
271	1.81864	0.0434888	0.031
272	1.30254	0.0315366	0.1466
273	1.52053	0.0366211	0.066
274	1.56222	0.0375874	0.058
275	1.56717	0.0377022	0.0722
276	1.59799	0.0384152	0.0428
277	1.71428	0.0410957	0.0304
278	1.58281	0.038064	0.0646
279	1.37921	0.033331	0.1072
280	1.90158	0.0453821	0.0228
281	1.89645	0.0452652	0.0234
282	1.92281	0.0458654	0.0242
283	1.42814	0.0344726	0.0894
284	1.68561	0.0404363	0.044
285	1.54183	0.0371151	0.0712
286	1.52347	0.0366894	0.07
287	1.55698	0.0374661	0.0602
288	1.76194	0.04219	0.0344
289	1.56859	0.037735	0.0688
290	1.4274	0.0344555	0.0952
291	1.80478	0.0431715	0.0284
292	1.90735	0.0455135	0.0188
293	2.01776	0.0480217	0.0144
294	2.02706	0.0482323	0.0144
295	1.55979	0.0375312	0.064
296	1.90608	0.0454845	0.0244
297	2.04778	0.0487013	0.0086
298	1.71903	0.0412049	0.0374
299	1.85959	0.0444245	0.0214
300	1.58909	0.0382092	0.0578
301	1.56113	0.0375623	0.0598
302	1.67429	0.0401756	0.0452
303	1.89214	0.0451669	0.0198
304	1.67373	0.0401628	0.0434
305	1.99058	0.0474055	0.0194
306	1.39967	0.0338088	0.1044
307	1.58241	0.0380549	0.0584
308	1.64626	0.0395296	0.0406
309	2.12257	0.0503904	0.0072
310	2.10224	0.0499318	0.0092
311	1.71255	0.0410559	0.037
312	1.72513	0.0413452	0.0386
313	1.47446	0.0355509	0.083
314	1.51175	0.0364173	0.0692
315	1.81351	0.0433715	0.0256
316	1.52011	0.0366115	0.0794
317	1.48967	0.0359046	0.0818
318	1.48771	0.035859	0.0874
319	1.35852	0.0328473	0.13
320	1.7729	0.0424414	0.0246
321	1.77843	0.0425681	0.0296
322	1.69363	0.0406208	0.0376
323	1.64428	0.0394838	0.0426
324	1.7315	0.0414914	0.0344
325	1.31424	0.0318108	0.1586
326	1.87093	0.0446832	0.0206
327	1.71774	0.0411753	0.0356
328	1.78825	0.042793	0.035
329	1.71288	0.0410635	0.0396
330	1.77484	0.0424859	0.0308
331	1.98836	0.0473549	0.0138
332	1.76369	0.0422303	0.0338
333	2.21723	0.0525196	0.0074
334	1.3852	0.033471	0.1138
335	1.59931	0.0384456	0.0498
336	1.64474	0.0394946	0.0388
337	1.84649	0.0441252	0.0178
338	1.5679	0.0377189	0.0572
339	1.59357	0.038313	0.0504
340	1.4602	0.0352192	0.0906
341	1.64289	0.0394518	0.045
342	1.55363	0.0373885	0.0632
343	1.67984	0.0403034	0.0476
344	1.67191	0.0401207	0.0458
345	1.40837	0.0340117	0.0952
346	1.60025	0.0384673	0.052
347	1.52417	0.0367057	0.082
348	1.83022	0.0437536	0.0272
349	2.11629	0.0502487	0.0104
350	1.65119	0.0396432	0.057
351	1.70554	0.0408947	0.0448
352	1.63239	0.0392095	0.0396
353	1.3761	0.0332584	0.1218
354	1.63315	0.039227	0.0438
355	1.55603	0.0374441	0.059
356	1.711	0.0410204	0.0392
357	1.88338	0.0449672	0.02
358	1.90464	0.0454518	0.018
359	1.99442	0.0474925	0.016
360	1.684	0.0403992	0.0492
361	1.64269	0.0394472	0.0446
362	1.61296	0.0387609	0.044
363	1.38171	0.0333895	0.1208
364	1.58592	0.0381359	0.0556
365	1.91888	0.0457761	0.016
366	1.78451	0.0427075	0.029
367	1.41584	0.034186	0.1024
368	1.28658	0.0311622	0.1632
369	1.40002	0.033817	0.1126
370	1.85349	0.0442852	0.0192
371	1.68685	0.0404648	0.04
372	1.7688	0.0423475	0.0348
373	1.74824	0.0418757	0.0348
374	1.27125	0.0308023	0.1688
375	1.7598	0.0421409	0.034
376	1.60784	0.0386427	0.0612
377	1.31281	0.0317774	0.1336
378	1.87539	0.0447851	0.0294
379	2	0.047619	0.0134
380	1.84922	0.0441878	0.0282
381	1.82158	0.0435559	0.0226
382	2.00446	0.0477203	0.0094
383	1.76911	0.0423545	0.035
384	1.46035	0.0352228	0.0962
385	1.74315	0.0417589	0.0368
386	1.89698	0.0452773	0.0176
387	1.62015	0.038927	0.0552
388	1.4593	0.0351985	0.0844
389	1.79559	0.0429611	0.031
390	2.17448	0.0515591	0.0098
391	1.32239	0.0320017	0.1406
392	1.58503	0.0381154	0.0458
393	2.02412	0.0481657	0.0202
394	1.77729	0.042542	0.026
395	1.74706	0.0418487	0.0344
396	1.65582	0.0397501	0.0508
397	1.38282	0.0334152	0.1148
398	1.63862	0.0393534	0.0506
399	1.45459	0.0350888	0.0818
400	1.80983	0.0432873	0.0216
401	1.78881	0.042806	0.0302
402	1.36141	0.032915	0.1194
403	1.63601	0.0392932	0.0458
404	1.60854	0.0386588	0.0552
405	1.55764	0.0374813	0.058
406	1.75549	0.0420422	0.034
407	1.4124	0.0341056	0.1044
408	1.65433	0.0397157	0.0424
409	1.81218	0.0433409	0.0272
410	1.44241	0.0348051	0.0882
411	1.77122	0.0424028	0.0342
412	2.25205	0.0533003	0.0042
413	1.91262	0.0456334	0.014
414	1.58553	0.0381269	0.0554
415	1.69225	0.0405891	0.0412
416	1.98554	0.0472911	0.0146
417	1.79185	0.0428755	0.0326
418	1.72569	0.0413581	0.0328
419	1.79159	0.0428696	0.0282
420	1.76452	0.0422494	0.0376
421	1.45747	0.0351558	0.0888
422	1.64872	0.0395863	0.0496
423	1.40819	0.0340076	0.117
424	1.86274	0.0444963	0.0284
425	1.65787	0.0397972	0.0514
426	1.73879	0.0416589	0.033
427	1.5591	0.0375152	0.0604
428	1.86944	0.0446493	0.02
429	1.59121	0.0382584	0.0526
430	1.67963	0.0402985	0.0448
431	1.52584	0.0367442	0.0688
432	1.41448	0.0341542	0.1134
433	2.18387	0.0517703	0.009
434	1.92224	0.0458524	0.0182
435	1.69649	0.0406866	0.0346
436	1.62011	0.0389262	0.046
437	1.60706	0.0386248	0.0524
438	1.58901	0.0382075	0.0542
439	1.61378	0.0387798	0.0532
440	1.26598	0.0306785	0.1762
441	2.00436	0.0477179	0.0134
442	1.64574	0.0395176	0.0464
443	1.82221	0.0435704	0.0328
444	2.03514	0.0484152	0.013
445	1.46983	0.0354434	0.078
446	1.71405	0.0410906	0.0298
447	1.68025	0.040313	0.0358
448	1.72619	0.0413694	0.0348
449	1.86977	0.0446567	0.021
450	1.43548	0.0346436	0.1018
451	1.37328	0.0331925	0.118
452	1.79268	0.0428947	0.0346
453	1.83826	0.0439372	0.024
454	1.60525	0.0385828	0.0536
455	1.34107	0.0324392	0.127
456	1.691	0.0405604	0.0406
457	1.79161	0.04287	0.0254
458	1.68083	0.0403262	0.042
459	1.78251	0.0426615	0.0312
460	1.8399	0.0439748	0.027
461	1.94067	0.0462718	0.0164
462	1.47276	0.0355114	0.0856
463	2.01174	0.0478851	0.0158
464	1.61297	0.0387613	0.0596
465	1.74009	0.0416888	0.0348
466	1.65498	0.0397307	0.0518
467	1.61256	0.0387518	0.0642
468	1.56531	0.037659	0.0652
469	1.64524	0.039506	0.0566
470	1.66937	0.0400623	0.0408
471	1.44664	0.0349037	0.1
472	1.54842	0.0372678	0.0726
473	1.61693	0.0388527	0.0436
474	1.64813	0.0395728	0.0446
475	1.75105	0.0419403	0.031
476	1.62457	0.0390291	0.0598
477	1.90197	0.045391	0.0152
478	1.47666	0.0356021	0.0772
479	1.78508	0.0427204	0.021
480	2.23491	0.0529162	0.0074
481	1.64464	0.0394922	0.0588
482	1.49645	0.0360622	0.0746
483	1.86856	0.0446291	0.0244
484	1.31055	0.0317243	0.1434
485	1.68288	0.0403733	0.0416
486	1.62078	0.0389415	0.043
487	1.73953	0.041676	0.0326
488	1.19149	0.0289257	0.2022
489	1.65267	0.0396774	0.0382
490	1.8379	0.0439292	0.0304
491	1.58732	0.0381683	0.0598
492	1.19592	0.0290301	0.2252
493	2.14715	0.0509442	0.0094
494	1.5284	0.0368037	0.076
495	1.76739	0.0423151	0.028
496	1.62368	0.0390086	0.0442
497	1.48592	0.0358174	0.0802
498	1.66308	0.0399172	0.045
499	1.91054	0.0455863	0.0178
500	1.64104	0.0394093	0.0416
501	2.01945	0.0480599	0.015
502	1.5699	0.0377653	0.0662
503	1.63469	0.0392626	0.043
504	1.45749	0.0351563	0.0814
505	1.37007	0.0331175	0.111
506	2.16088	0.0512533	0.0084
507	1.45496	0.0350973	0.0836
508	1.56523	0.0376572	0.0616
509	1.46105	0.0352391	0.0964
510	1.9269	0.0459587	0.0128
511	1.5975	0.0384038	0.0592
512	1.48818	0.03587	0.0726
513	1.66831	0.0400379	0.0368
514	1.74977	0.0419108	0.0364
515	1.97283	0.0470026	0.0186
516	2.09515	0.0497717	0.0118
517	1.69605	0.0406765	0.0364
518	1.55337	0.0373826	0.0664
519	1.94923	0.0464664	0.0144
520	1.64833	0.0395773	0.0386
521	1.84959	0.0441962	0.0288
522	1.95458	0.0465879	0.0136
523	1.87444	0.0447634	0.0192
524	1.54983	0.0373006	0.068
525	1.85924	0.0444165	0.0216
526	1.84667	0.0441294	0.0268
527	1.96598	0.046847	0.013
528	1.30077	0.0314952	0.1544
529	1.82431	0.0436184	0.0296
530	1.74305	0.0417567	0.0386
531	1.60315	0.0385342	0.0644
532	1.97798	0.0471195	0.0186
533	2.00656	0.0477678	0.012
534	1.89339	0.0451954	0.0214
535	1.41668	0.0342056	0.1024
536	2.04693	0.0486821	0.0106
537	1.58002	0.0379994	0.0522
538	1.49333	0.0359897	0.0864
539	1.53058	0.0368544	0.0674
540	1.52029	0.0366156	0.0794
541	1.55752	0.0374787	0.0746
542	1.71216	0.041047	0.0408
543	1.70159	0.0408039	0.0424
544	1.45535	0.0351065	0.0964
545	1.50539	0.0362697	0.0798
546	1.4016	0.0338538	0.113
547	1.71604	0.0411362	0.038
548	1.4277	0.0344625	0.0992
549	1.57545	0.0378937	0.0574
550	1.85441	0.0443062	0.0234
551	1.76885	0.0423484	0.0292
552	1.52405	0.0367029	0.0626
553	1.6727	0.0401391	0.0406
554	1.91404	0.0456658	0.019
555	1.69722	0.0407034	0.0398
556	1.57623	0.0379117	0.0554
557	1.5005	0.0361562	0.0732
558	1.79842	0.0430261	0.0286
559	1.49542	0.0360381	0.0806
560	1.88521	0.045009	0.0142
561	1.57592	0.0379045	0.057
562	1.56902	0.0377449	0.0602
563	2.04528	0.0486448	0.013
564	2.01812	0.0480298	0.0166
565	1.53515	0.0369602	0.0562
566	1.83229	0.0438008	0.025
567	1.81019	0.0432954	0.0254
568	1.44519	0.0348698	0.094
569	1.63303	0.0392244	0.0508
570	1.43961	0.0347399	0.0866
571	1.88975	0.0451124	0.0272
572	1.64912	0.0395955	0.0502
573	1.687	0.0404683	0.0452
574	1.63707	0.0393177	0.0466
575	1.42028	0.0342894	0.0918
576	1.80751	0.0432342	0.0258
577	1.73195	0.0415018	0.0284
578	1.71058	0.0410107	0.0404
579	1.78678	0.0427594	0.0396
580	1.65382	0.039704	0.054
581	1.53279	0.0369056	0.0648
582	1.57077	0.0377854	0.055
583	1.66898	0.0400532	0.042
584	1.56503	0.0376526	0.0698
585	1.73523	0.041577	0.0404
586	1.50347	0.0362252	0.075
587	1.83093	0.0437698	0.0276
588	1.66708	0.0400094	0.0388
589	1.52822	0.0367995	0.069
590	1.45322	0.0350569	0.0882
591	1.57868	0.0379685	0.0712
592	1.72022	0.0412323	0.0324
593	1.76745	0.0423164	0.0304
594	1.96745	0.0468803	0.0112
595	2.14065	0.0507976	0.0078
596	1.7998	0.0430575	0.0298
597	1.89759	0.0452912	0.0256
598	1.61733	0.038862	0.0566
599	1.87484	0.0447724	0.0216
600	1.45633	0.0351294	0.0922
601	1.89506	0.0452336	0.0182
602	1.90105	0.04537	0.0168
603	1.68101	0.0403303	0.045
604	1.67358	0.0401593	0.0396
605	1.51404	0.0364706	0.0684
606	1.59855	0.038428	0.0506
607	1.48478	0.035791	0.0726
608	1.85444	0.0443069	0.03
609	1.57699	0.0379294	0.061
610	1.76636	0.0422914	0.0316
611	1.66193	0.0398908	0.05
612	2.14002	0.0507837	0.0068
613	1.77453	0.0424787	0.028
614	1.6256	0.0390529	0.059
615	1.49825	0.0361039	0.0786
616	1.60997	0.0386918	0.0486
617	1.83933	0.0439618	0.021
618	1.4119	0.0340941	0.0956
619	1.70124	0.040796	0.0436
620	1.90427	0.0454433	0.0162
621	1.59756	0.0384052	0.0542
622	1.61433	0.0387927	0.0574
623	1.43596	0.034655	0.0886
624	1.26718	0.0307066	0.1726
625	1.76397	0.0422366	0.0292
626	1.34324	0.0324899	0.1342
627	1.37407	0.0332109	0.1158
628	1.8476	0.0441507	0.0234
629	1.7595	0.0421341	0.0274
630	1.95289	0.0465495	0.018
631	1.90792	0.0455265	0.0228
632	1.56028	0.0375425	0.077
633	1.57939	0.0379848	0.0586
634	1.81138	0.0433227	0.0208
635	1.37406	0.0332106	0.1148
636	1.73674	0.0416117	0.038
637	1.61995	0.0389224	0.0594
638	1.65853	0.0398124	0.054
639	1.73906	0.041665	0.031
640	1.71711	0.0411608	0.0274
641	1.37505	0.0332338	0.104
642	2.14565	0.0509104	0.0122
643	1.73171	0.0414963	0.0348
644	1.63435	0.0392549	0.0402
645	1.59002	0.0382309	0.0454
646	1.63458	0.0392603	0.0432
647	1.68102	0.0403307	0.0516
648	1.81735	0.0434593	0.0234
649	1.64008	0.0393871	0.0438
650	1.20283	0.0291929	0.2098
651	1.51259	0.0364368	0.0742
652	1.66923	0.040059	0.0404
653	1.59584	0.0383653	0.0588
654	1.8407	0.043993	0.0304
655	1.28172	0.0310481	0.1586
656	1.53439	0.0369426	0.0774
657	1.64759	0.0395602	0.0432
658	1.9143	0.0456719	0.0244
659	1.7711	0.0424001	0.0274
660	1.36198	0.0329283	0.1222
661	1.89572	0.0452486	0.0254
662	1.67759	0.0402517	0.0484
663	1.49251	0.0359706	0.0864
664	1.77985	0.0426006	0.0276
665	2.06814	0.0491617	0.0108
666	1.84817	0.0441636	0.032
667	1.34567	0.0325467	0.139
668	2.01214	0.0478944	0.019
669	1.50109	0.03617	0.079
670	1.67804	0.0402619	0.036
671	1.40926	0.0340325	0.099
672	1.77848	0.0425694	0.025
673	1.8646	0.0445388	0.0258
674	1.84209	0.0440249	0.0194
675	1.89044	0.0451283	0.0186
676	1.75295	0.0419839	0.0394
677	1.98327	0.0472396	0.0158
678	1.74639	0.0418334	0.0314
679	1.44336	0.0348273	0.0978
680	1.90728	0.045512	0.0182
681	1.88597	0.0450262	0.0238
682	1.90045	0.0453564	0.0206
683	1.60925	0.0386753	0.0554
684	1.57745	0.0379399	0.0588
685	1.60107	0.0384863	0.0542
686	1.82809	0.0437049	0.0318
687	1.41499	0.0341661	0.1016
688	1.86398	0.0445247	0.0228
689	1.97048	0.0469493	0.0172
690	1.53675	0.0369973	0.0696
691	1.33172	0.0322203	0.1496
692	1.48598	0.0358188	0.0754
693	1.32296	0.0320152	0.1344
694	2.17318	0.05153	0.011
695	1.67172	0.0401165	0.0396
696	1.48213	0.0357294	0.0868
697	1.99086	0.0474117	0.017
698	1.6666	0.0399986	0.0456
699	1.58724	0.0381666	0.0556
700	1.62188	0.0389671	0.0554
701	1.61001	0.0386929	0.0488
702	1.83708	0.0439103	0.0258
703	1.93432	0.0461273	0.0168
704	1.87039	0.0446709	0.0228
705	1.48974	0.0359062	0.0816
706	1.5491	0.0372835	0.0738
707	2.08632	0.0495725	0.0126
708	1.97631	0.0470816	0.0148
709	1.52783	0.0367906	0.0678
710	1.57516	0.037887	0.066
711	1.62318	0.038997	0.0484
712	1.6438	0.0394729	0.041
713	1.81909	0.0434991	0.0312
714	1.86263	0.0444938	0.0338
715	1.44498	0.0348649	0.099
716	1.62587	0.0390592	0.0518
717	1.45368	0.0350675	0.0976
718	1.86927	0.0446453	0.026
719	1.52458	0.0367152	0.0744
720	1.8416	0.0440135	0.0276
721	1.42986	0.0345129	0.0926
722	1.68153	0.0403423	0.0438
723	1.56639	0.037684	0.0628
724	2.06065	0.0489923	0.0124
725	1.65019	0.0396201	0.0398
726	1.6241	0.0390184	0.046
727	1.65104	0.0396399	0.0468
728	2.16973	0.0514523	0.008
729	1.56364	0.0376204	0.0676
730	1.68704	0.0404692	0.0366
731	1.43419	0.0346137	0.094
732	1.8351	0.0438651	0.0188
733	1.41872	0.034253	0.0942
734	1.95041	0.0464932	0.0146
735	1.70035	0.0407754	0.0388
736	1.53256	0.0369003	0.08
737	1.54908	0.0372832	0.0536
738	1.74208	0.0417343	0.034
739	1.91436	0.0456731	0.0162
740	1.63787	0.0393362	0.05
741	1.73804	0.0416416	0.035
742	1.61248	0.0387499	0.0548
743	1.49641	0.0360611	0.078
744	1.94223	0.0463072	0.0134
745	1.52554	0.0367373	0.0726
746	1.68227	0.0403593	0.0444
747	1.65665	0.0397692	0.0466
748	1.40811	0.0340057	0.1002
749	1.96006	0.0467124	0.018
750	1.75463	0.0420224	0.0348
751	1.21958	0.0295875	0.1896
752	1.55837	0.0374983	0.0574
753	1.7151	0.0411145	0.0412
754	1.47516	0.0355673	0.0876
755	1.67869	0.0402769	0.0492
756	1.53409	0.0369358	0.068
757	1.47872	0.0356502	0.0836
758	1.43916	0.0347296	0.0918
759	1.76035	0.0421536	0.0332
760	1.49474	0.0360225	0.0826
761	1.63258	0.0392141	0.0588
762	1.51449	0.0364809	0.0682
763	1.7153	0.0411193	0.037
764	1.57006	0.037769	0.0588
765	1.49546	0.0360391	0.0774
766	2.07222	0.0492538	0.009
767	1.94616	0.0463967	0.0226
768	1.35973	0.0328758	0.1248
769	1.69271	0.0405996	0.0326
770	1.65793	0.0397988	0.0434
771	1.64902	0.0395933	0.0444
772	2.01397	0.0479357	0.013
773	1.77736	0.0425437	0.0308
774	1.84948	0.0441935	0.02
775	1.69731	0.0407054	0.0478
776	1.47772	0.0356268	0.0802
777	1.74759	0.0418609	0.0352
778	1.90535	0.045468	0.02
779	1.65809	0.0398024	0.0468
780	1.84661	0.044128	0.027
781	1.78651	0.0427532	0.0318
782	1.60529	0.0385838	0.048
783	1.83912	0.0439569	0.0238
784	1.7789	0.0425788	0.0312
785	1.44522	0.0348705	0.0882
786	1.86714	0.0445968	0.0238
787	1.34738	0.0325868	0.12
788	1.47635	0.035595	0.0788
789	2.11315	0.0501778	0.0106
790	1.33577	0.0323152	0.1304
791	1.53444	0.0369437	0.0686
792	1.67444	0.040179	0.0394
793	1.64628	0.0395302	0.0508
794	1.75873	0.0421165	0.0324
795	2.09767	0.0498286	0.0118
796	1.96937	0.0469239	0.0214
797	1.69077	0.040555	0.038
798	1.49439	0.0360142	0.0782
799	1.85122	0.0442334	0.0218
800	1.88442	0.044991	0.022
801	1.71001	0.0409976	0.0452
802	1.52499	0.0367246	0.0744
803	1.27689	0.0309347	0.1666
804	1.9143	0.0456717	0.022
805	1.59969	0.0384544	0.0566
806	1.81753	0.0434633	0.0248
807	1.56064	0.0375509	0.063
808	1.49227	0.0359649	0.0758
809	1.8545	0.0443083	0.0282
810	1.5965	0.0383807	0.0576
811	1.71523	0.0411177	0.0402
812	1.51925	0.0365914	0.0744
813	1.30138	0.0315094	0.148
814	1.66022	0.0398514	0.044
815	1.66962	0.040068	0.0414
816	1.84886	0.0441794	0.0216
817	2.03249	0.0483552	0.0066
818	1.57428	0.0378668	0.0588
819	1.78151	0.0426388	0.03
820	1.63701	0.0393162	0.051
821	1.65608	0.0397561	0.0388
822	1.70666	0.0409207	0.0382
823	1.43998	0.0347487	0.1012
824	1.6707	0.040093	0.0398
825	1.83727	0.0439146	0.0182
826	1.81068	0.0433067	0.0264
827	1.53993	0.037071	0.0728
828	2.11015	0.0501103	0.009
829	1.35527	0.0327715	0.1198
830	1.66773	0.0400246	0.058
831	1.8542	0.0443013	0.0258
832	1.96744	0.0468802	0.0162
833	1.52243	0.0366652	0.0634
834	1.65165	0.0396539	0.0462
835	1.62927	0.0391376	0.054
836	1.98739	0.0473331	0.0166
837	1.68178	0.0403481	0.0392
838	2.01273	0.0479076	0.0148
839	1.68723	0.0404736	0.0392
840	1.45443	0.0350849	0.0836
841	1.61307	0.0387635	0.055
842	1.2859	0.0311463	0.1584
843	2.0043	0.0477164	0.017
844	1.57242	0.0378237	0.0622
845	1.56995	0.0377665	0.0724
846	1.93042	0.0460387	0.0182
847	1.40712	0.0339825	0.1004
848	1.50157	0.036181	0.0754
849	1.943	0.0463249	0.015
850	1.65896	0.0398224	0.0568
851	1.83105	0.0437725	0.0218
852	1.52314	0.0366818	0.077
853	2.10981	0.0501026	0.0112
854	1.40169	0.0338558	0.1108
855	1.56691	0.0376961	0.0544
856	1.68231	0.0403603	0.0416
857	1.91231	0.0456265	0.0186
858	1.63901	0.0393623	0.0528
859	1.79481	0.0429435	0.0266
860	1.50502	0.0362611	0.0808
861	1.53059	0.0368546	0.0674
862	1.53511	0.0369593	0.0756
863	1.74693	0.0418458	0.0306
864	1.58482	0.0381106	0.0616
865	1.64146	0.0394189	0.0452
866	1.24564	0.0302005	0.1686
867	1.62427	0.0390222	0.0538
868	1.82815	0.0437062	0.0234
869	1.80023	0.0430675	0.029
870	1.82042	0.0435294	0.023
871	1.66019	0.0398508	0.0548
872	1.40125	0.0338455	0.111
873	1.2011	0.0291521	0.1942
874	1.80327	0.0431371	0.03
875	1.6785	0.0402725	0.0388
876	1.73234	0.0415107	0.0322
877	1.66617	0.0399884	0.0436
878	1.45943	0.0352015	0.0888
879	2.11461	0.0502108	0.0132
880	1.72433	0.0413267	0.03
881	1.53118	0.0368681	0.0714
882	2.1544	0.0511074	0.008
883	1.56262	0.0375967	0.0592
884	1.90081	0.0453645	0.0174
885	1.71841	0.0411906	0.0374
886	1.97233	0.0469912	0.0214
887	1.47404	0.0355412	0.0866
888	1.71994	0.0412258	0.047
889	1.72493	0.0413405	0.0344
890	1.6796	0.0402979	0.0506
891	1.34582	0.0325504	0.1334
892	1.70607	0.0409069	0.041
893	1.57132	0.0377982	0.0568
894	1.47521	0.0355685	0.0768
895	1.60019	0.038466	0.054
896	1.83968	0.0439698	0.0276
897	1.53834	0.0370343	0.0664
898	1.43782	0.0346983	0.0972
899	1.68772	0.0404847	0.0378
900	2.31897	0.0547975	0.0038
901	1.47041	0.0354569	0.0866
902	1.71375	0.0410836	0.0304
903	1.95967	0.0467037	0.0196
904	1.82213	0.0435685	0.0304
905	1.45344	0.0350619	0.093
906	1.9175	0.0457446	0.0198
907	1.60085	0.0384811	0.0482
908	1.63403	0.0392475	0.0522
909	1.78667	0.0427568	0.035
910	1.78592	0.0427397	0.0286
911	1.51783	0.0365585	0.0748
912	1.69999	0.0407673	0.0374
913	2.04686	0.0486805	0.014
914	1.9598	0.0467066	0.0162
915	1.48275	0.0357438	0.0794
916	1.81743	0.0434612	0.0278
917	1.2372	0.0300021	0.1828
918	1.63025	0.0391602	0.0496
919	1.75538	0.0420396	0.028
920	1.92829	0.0459902	0.0188
921	1.75602	0.0420544	0.0314
922	1.57785	0.0379493	0.0542
923	1.80389	0.0431512	0.0204
924	1.68473	0.0404161	0.0476
925	1.46792	0.0353988	0.0794
926	1.63136	0.0391859	0.0522
927	1.92796	0.0459826	0.0144
928	2.15978	0.0512284	0.011
929	1.81776	0.0434686	0.0236
930	1.74429	0.041785	0.0378
931	1.50457	0.0362506	0.0798
932	1.69845	0.0407316	0.0428
933	1.48284	0.0357458	0.087
934	1.53834	0.0370341	0.0658
935	1.80657	0.0432126	0.025
936	1.61931	0.0389077	0.058
937	1.83857	0.0439443	0.023
938	1.60105	0.0384857	0.0516
939	1.7324	0.0415122	0.0388
940	1.79551	0.0429594	0.0242
941	1.66851	0.0400424	0.0498
942	1.45981	0.0352102	0.0852
943	1.81818	0.0434781	0.0308
944	1.53634	0.0369877	0.0668
945	1.7788	0.0425766	0.0308
946	1.77156	0.0424107	0.0378
947	1.53208	0.0368892	0.0636
948	1.73423	0.0415541	0.0342
949	1.55605	0.0374447	0.058
950	2.01567	0.0479744	0.0158
951	1.66626	0.0399905	0.0456
952	1.68449	0.0404104	0.0396
953	1.3297	0.0321731	0.1234
954	1.74642	0.0418341	0.0332
955	1.89833	0.0453079	0.0148
956	1.92773	0.0459775	0.0204
957	1.56358	0.0376189	0.0692
958	1.61025	0.0386985	0.0564
959	1.48624	0.0358248	0.0756
960	1.73764	0.0416323	0.035
961	1.65528	0.0397377	0.0466
962	2.07195	0.0492478	0.0166
963	1.80656	0.0432123	0.0294
964	1.7441	0.0417806	0.0266
965	1.70909	0.0409765	0.0386
966	1.89894	0.045322	0.0124
967	1.96215	0.04676	0.016
968	1.80552	0.0431886	0.0304
969	1.53073	0.0368577	0.0734
970	1.66969	0.0400696	0.0418
971	1.70758	0.0409418	0.0308
972	1.61335	0.0387699	0.0492
973	1.66382	0.0399345	0.0474
974	1.61828	0.0388839	0.046
975	1.7053	0.0408892	0.041
976	1.39236	0.033638	0.1132
977	1.75843	0.0421097	0.0306
978	1.79326	0.0429079	0.0368
979	1.74464	0.0417931	0.0422
980	1.48333	0.0357573	0.0758
981	1.96026	0.0467171	0.0156
982	2.01984	0.0480688	0.0132
983	1.32147	0.0319801	0.1272
984	1.80703	0.0432232	0.0248
985	1.5869	0.0381586	0.055
986	1.72919	0.0414383	0.0372
987	1.58742	0.0381707	0.056
988	1.42086	0.034303	0.1088
989	1.77454	0.0424789	0.0406
990	1.63641	0.0393024	0.0474
991	1.75073	0.0419329	0.0304
992	1.60195	0.0385067	0.0522
993	1.75952	0.0421345	0.0378
994	1.50663	0.0362986	0.0752
995	1.66438	0.0399473	0.0522
996	1.86554	0.0445603	0.0176
997	1.87046	0.0446725	0.0228
998	1.99774	0.0475678	0.0142
999	1.4992	0.0361259	0.0752
1000	1.74771	0.0418636	0.0326
